# Supplementary material for: High-performance flexible asymmetric supercapacitors based on a new graphene foam/carbon nanotube hybrid film
Source: Royal Society of Chemistry journal article supplement (doi:10.1039/c4ee01475h), 2014-08-18
Supplement: c4ee01475h1.pdf [file c4ee01475h1.pdf]

## Electronic Supplementary Information

### High-performance Flexible Asymmetric Supercapacitors Based on A New Graphene Foam/Carbon Nanotubes Hybrid Film

*Jilei Liu,<sup>abc</sup> Lili Zhang,<sup>b</sup> Hao Bin Wu,<sup>c</sup> Jianyi Lin,<sup>ab</sup> Zexiang Shen,<sup>\*a</sup> and Xiong Wen (David) Lou<sup>\*c</sup>*

<sup>a</sup> Division of Physics and Applied Physics, School of Physical and Mathematical Sciences, Nanyang Technological University, 21 Nanyang link, Singapore 637371 Email: [zhexiang@ntu.edu.sg](mailto:zhexiang@ntu.edu.sg)

<sup>b</sup> Heterogeneous Catalysis, Institute of Chemical Engineering and Sciences, A\*Star, 1 Pesek Road, Jurong Island, Singapore 627833

<sup>c</sup> School of Chemical and Biomedical Engineering, Nanyang Technological University, 62 Nanyang Drive, Singapore 637459

Email: [xwlou@ntu.edu.sg](mailto:xwlou@ntu.edu.sg) or [davidlou88@gmail.com](mailto:davidlou88@gmail.com); webpage: <http://www.ntu.edu.sg/home/xwlou/>

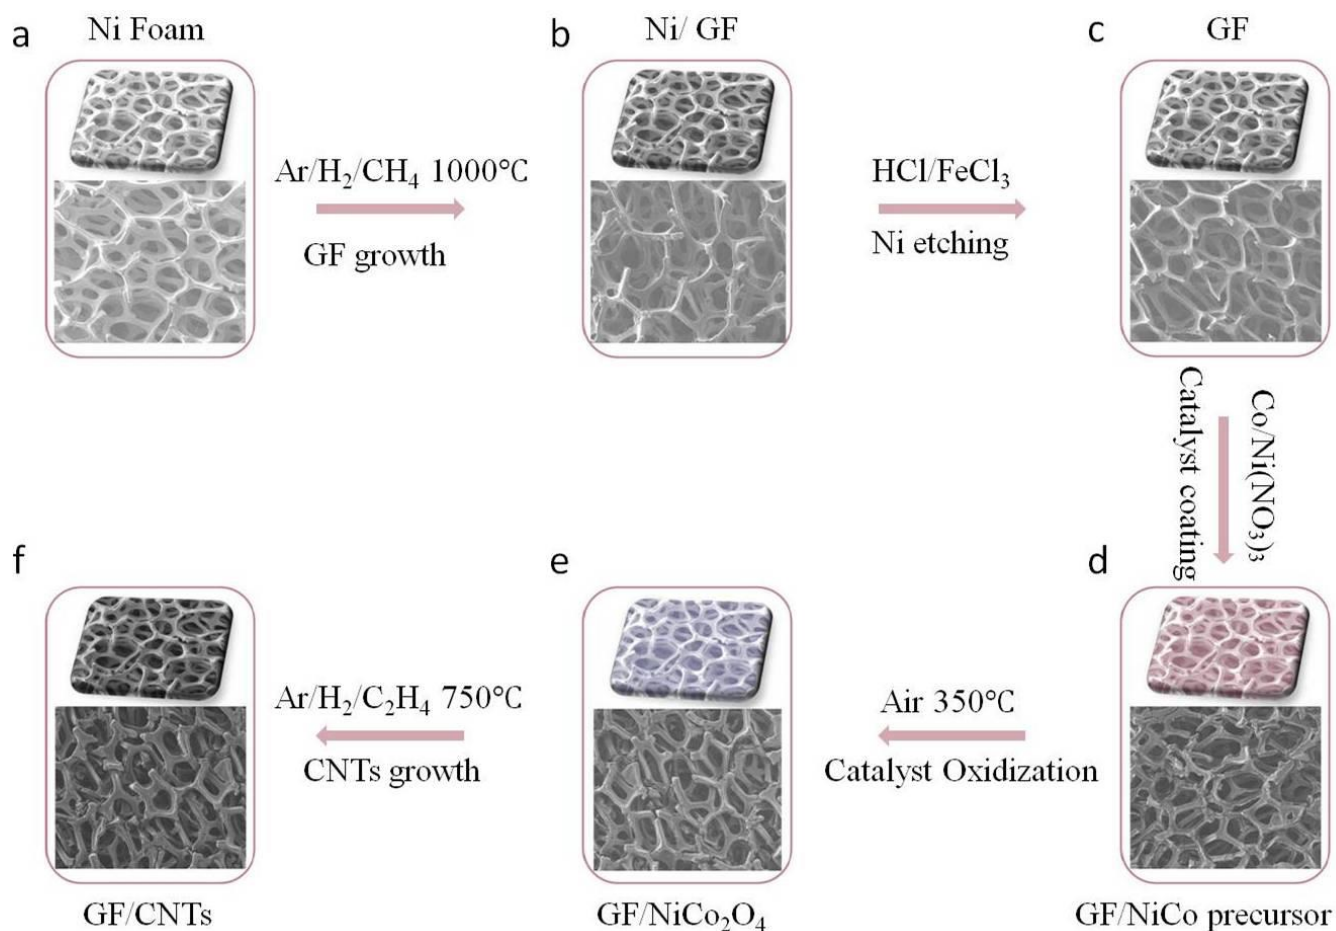

**Fig. S1** Illustration of the growth procedure of GF/CNTs hybrid films. **(a)** Ni foam substrate; **(b)** direct growth of graphene films on nickel foam via  $\text{CH}_4$  decomposition; **(c)** removal of Ni network to form free-standing graphene foam (GF); **(d)** deposition of NiCo-precursor on the GF via a hydrothermal method; **(e)** conversion of GF/NiCo-precursor to  $\text{GF}/\text{NiCo}_2\text{O}_4$ ; **(f)** growth of carbon nanotubes onto GF at  $750^{\circ}\text{C}$  in the presence of  $\text{H}_2$  and  $\text{C}_2\text{H}_4$  using the Ni-Co-O catalyst, forming 3D GF/CNTs hybrid structure.

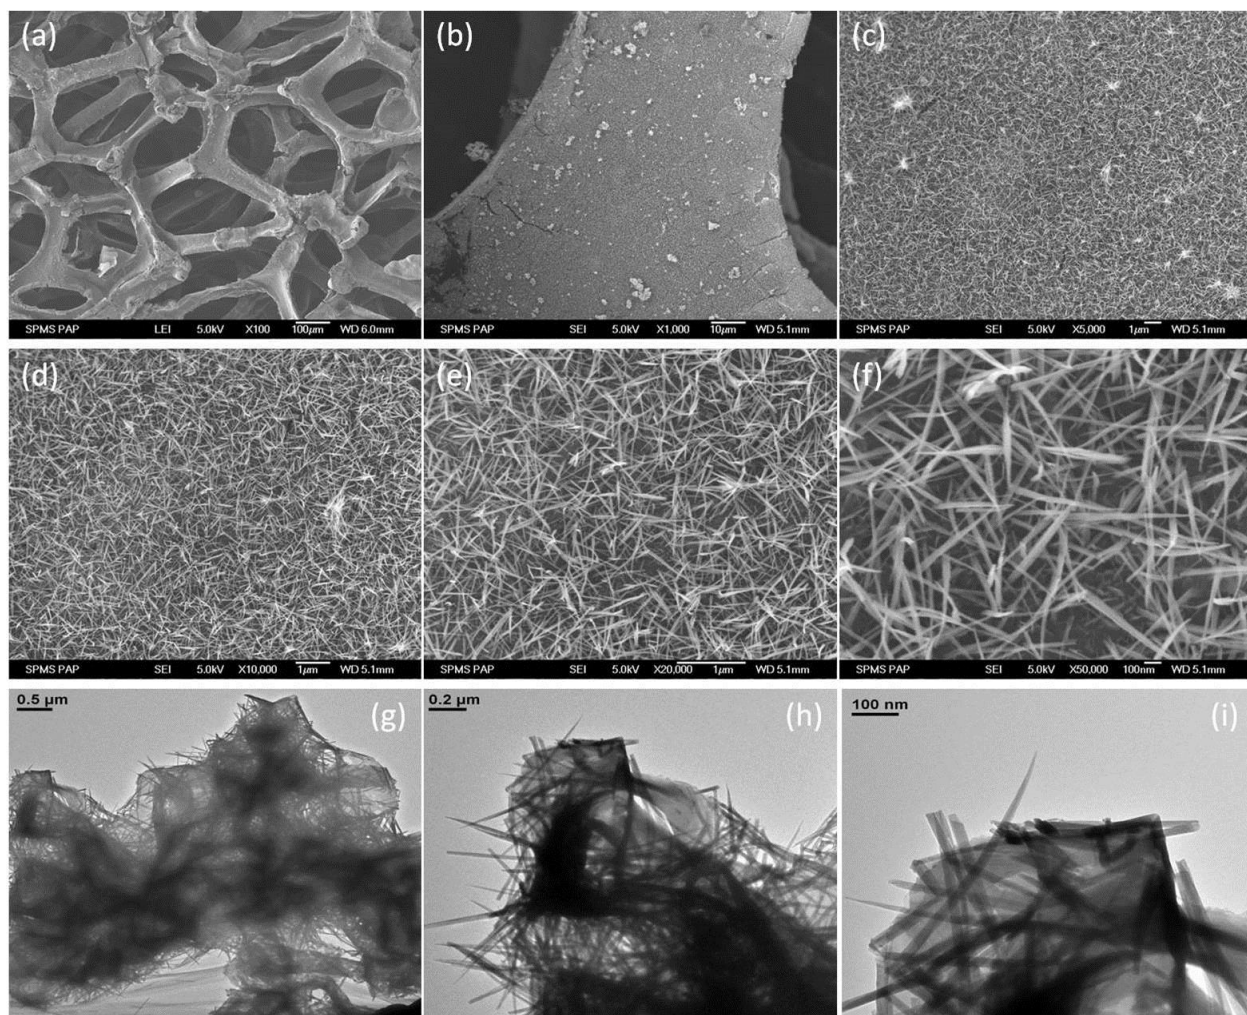

**Fig. S2** (a-f) Typical FESEM and (g-i) TEM images of the GF/NiCo<sub>2</sub>O<sub>4</sub> hybrid film.

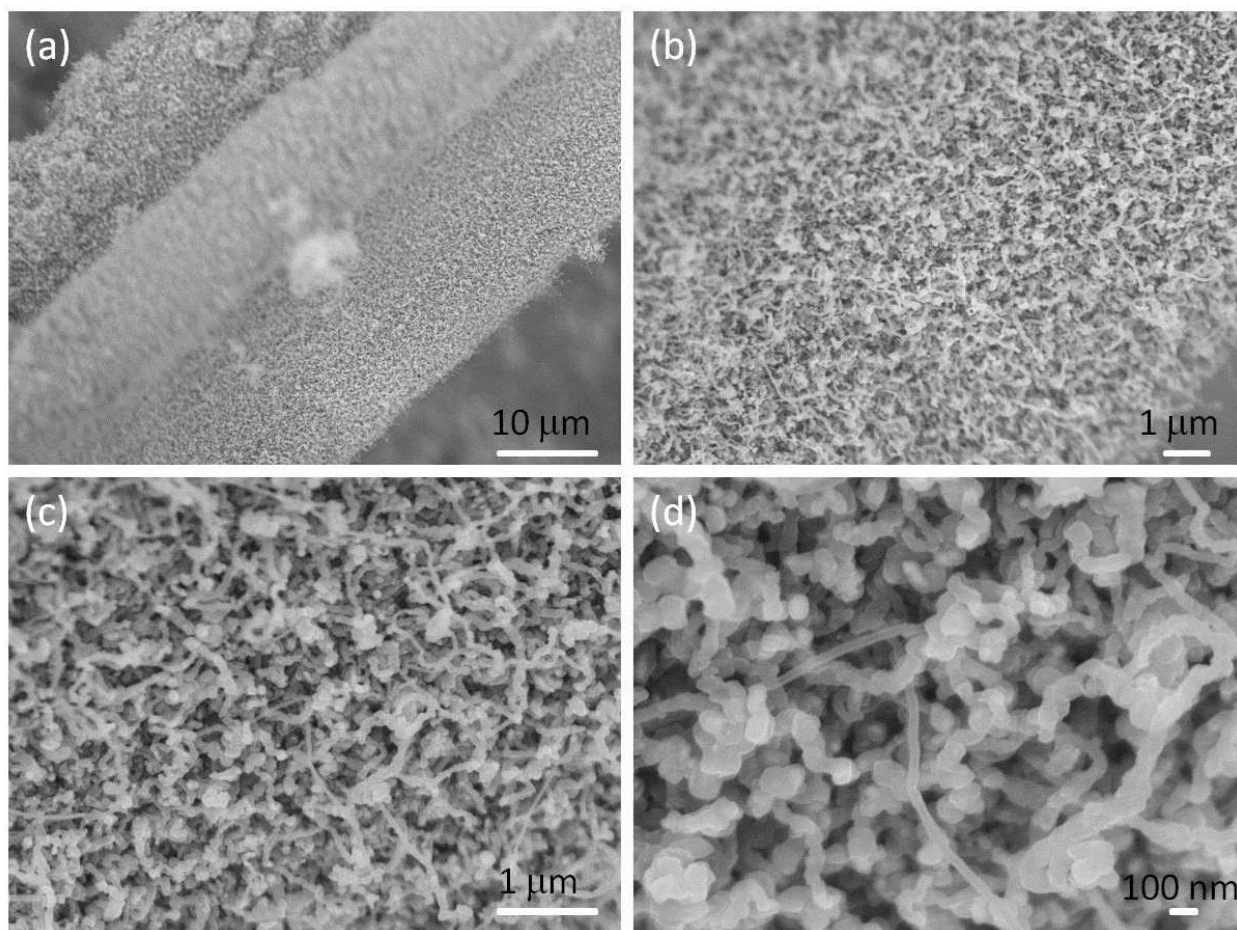

**Fig. S3** FESEM images of GF/CNTs hybrid film using a conventional dip-coating method to load NiCo catalysts.

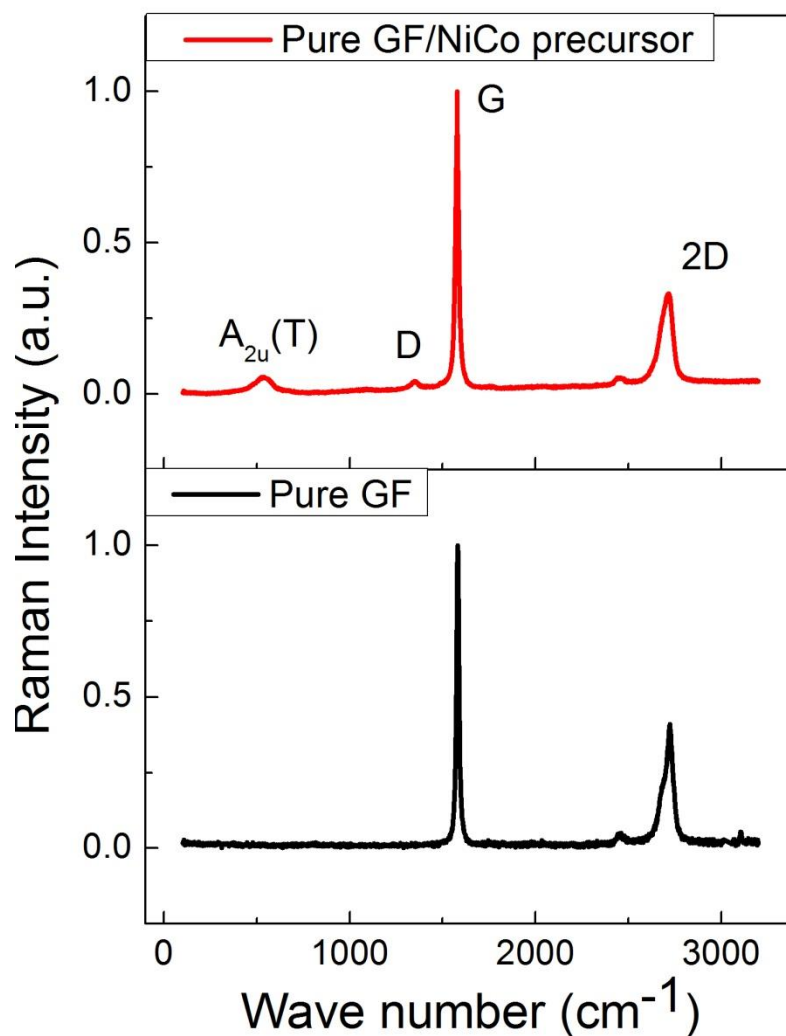

**Fig. S4** Comparative Raman spectrums of the pure GF before and after NiCo precursor coating. The peak A<sub>2u</sub> (T) at about 515 cm<sup>-1</sup> is attribute to the formation of NiCo precursor.<sup>1</sup> The low intensity of D band for GF/NiCo precursor hybrid film suggests that only a few defects were introduced during catalyst loading process.<sup>2</sup>

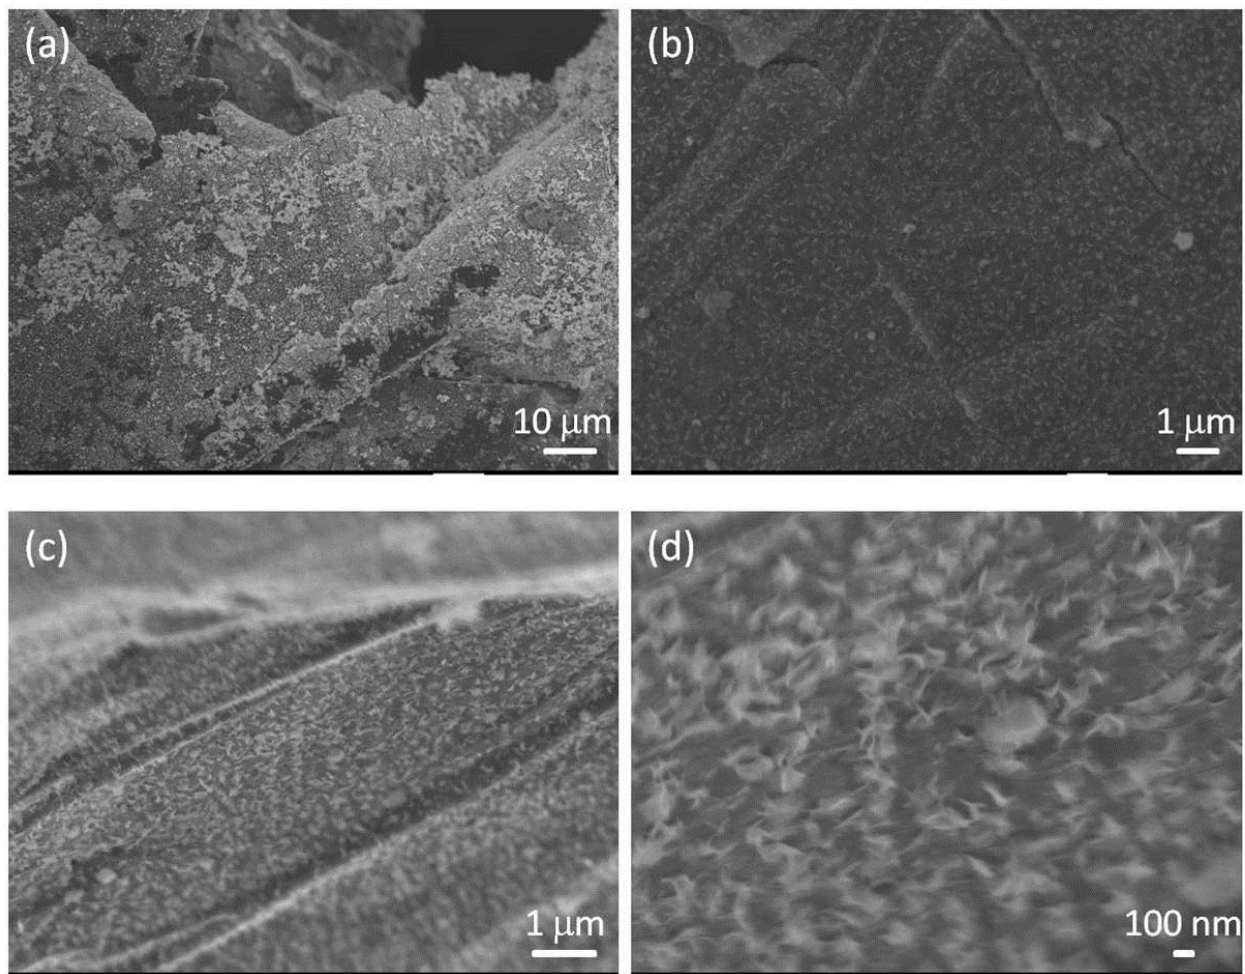

**Fig. S5** Typical FESEM images of the GF/NiCo<sub>2</sub>O<sub>4</sub> hybrid film after annealed in H<sub>2</sub> atmosphere at 350 °C for 0.5 h. The formation of catalyst islands is clearly observed.



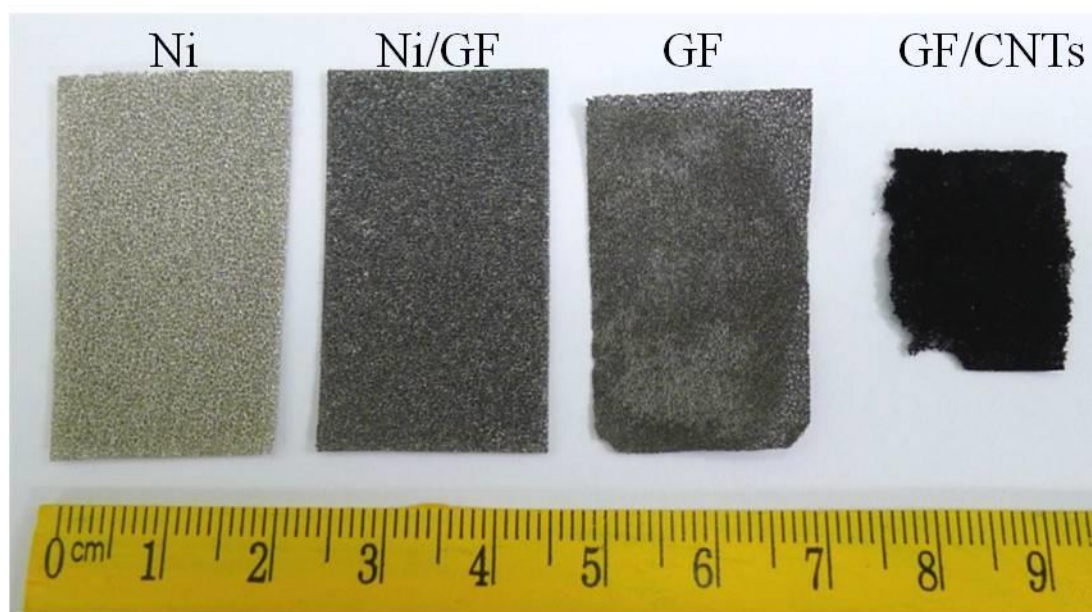

**Fig. S6** Optical images of inch-scaled nickel foam (Ni), Ni/GF, GF, and GF/CNTs.

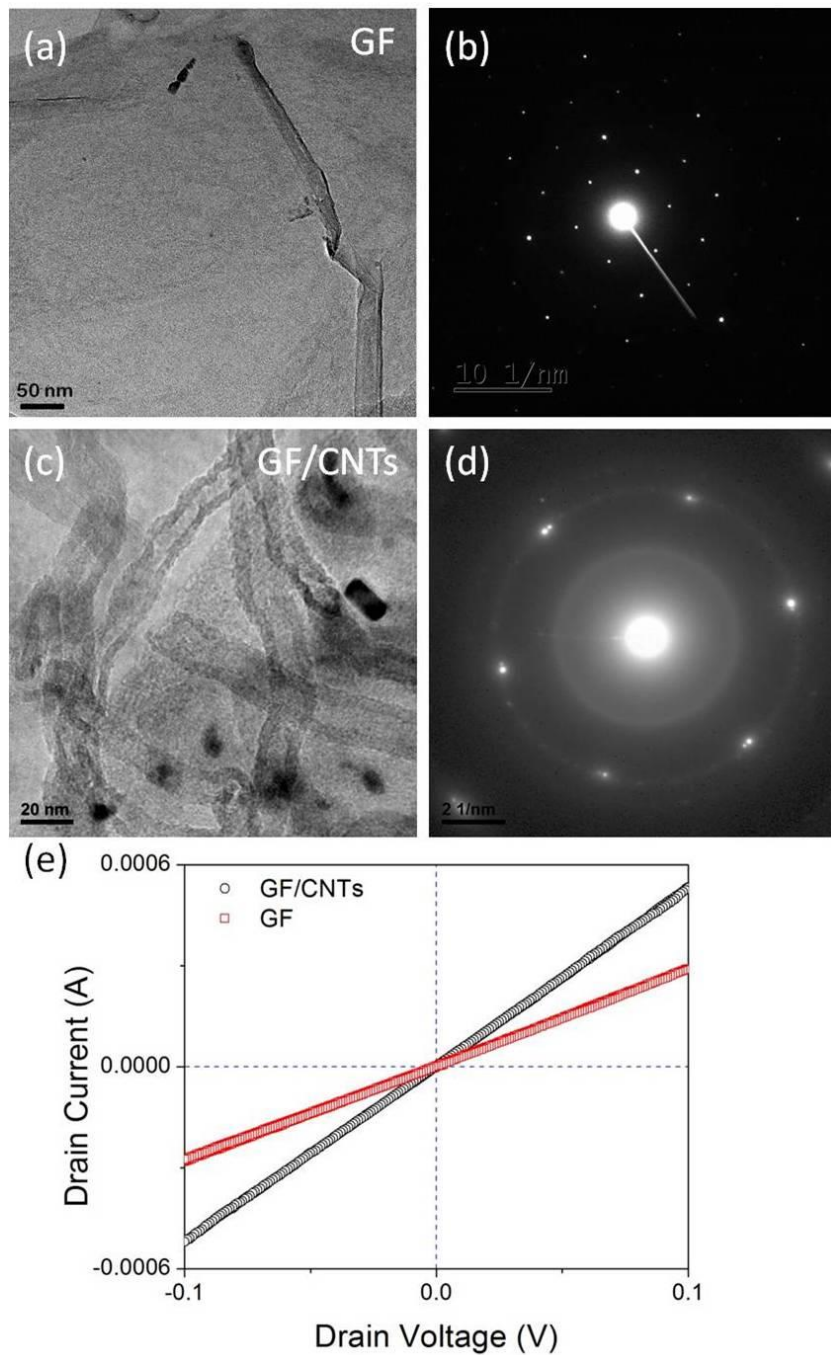

**Fig. S7** Typical TEM images of pure GF (a), GF/CNTs(c) and their corresponding selected area electron diffraction patterns (b) and (d), respectively. (e) Comparative I-V curves of pure GF (thickness of 28  $\mu\text{m}$ ) and GF/CNTs hybrid film (thickness of 29  $\mu\text{m}$ ). Corresponding conductance were measured to be 101 S/m for GF and 178 S/m for GF/CNTs hybrid film.



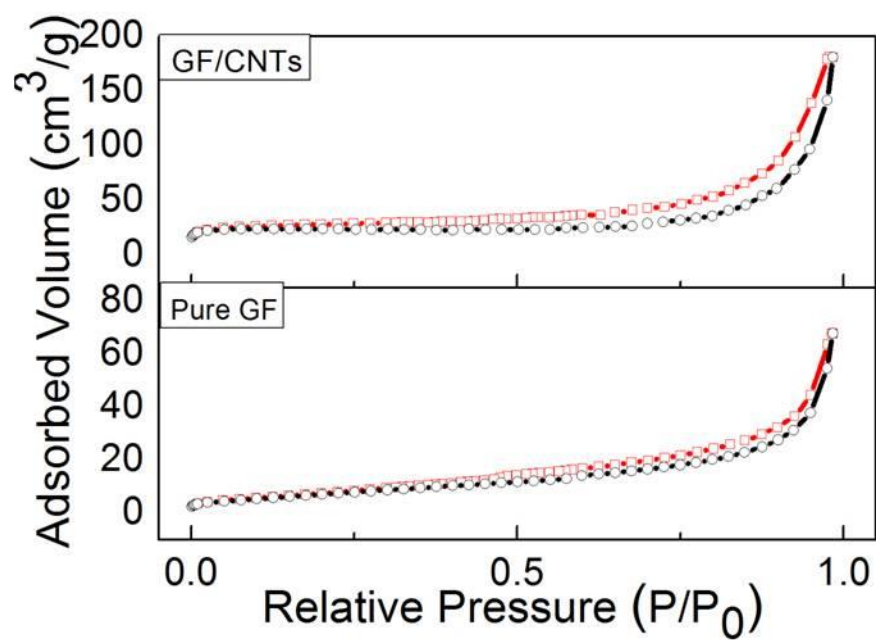

**Fig. S8** N<sub>2</sub> adsorption/desorption isotherms of pure GF and GF/CNTs hybrid film.

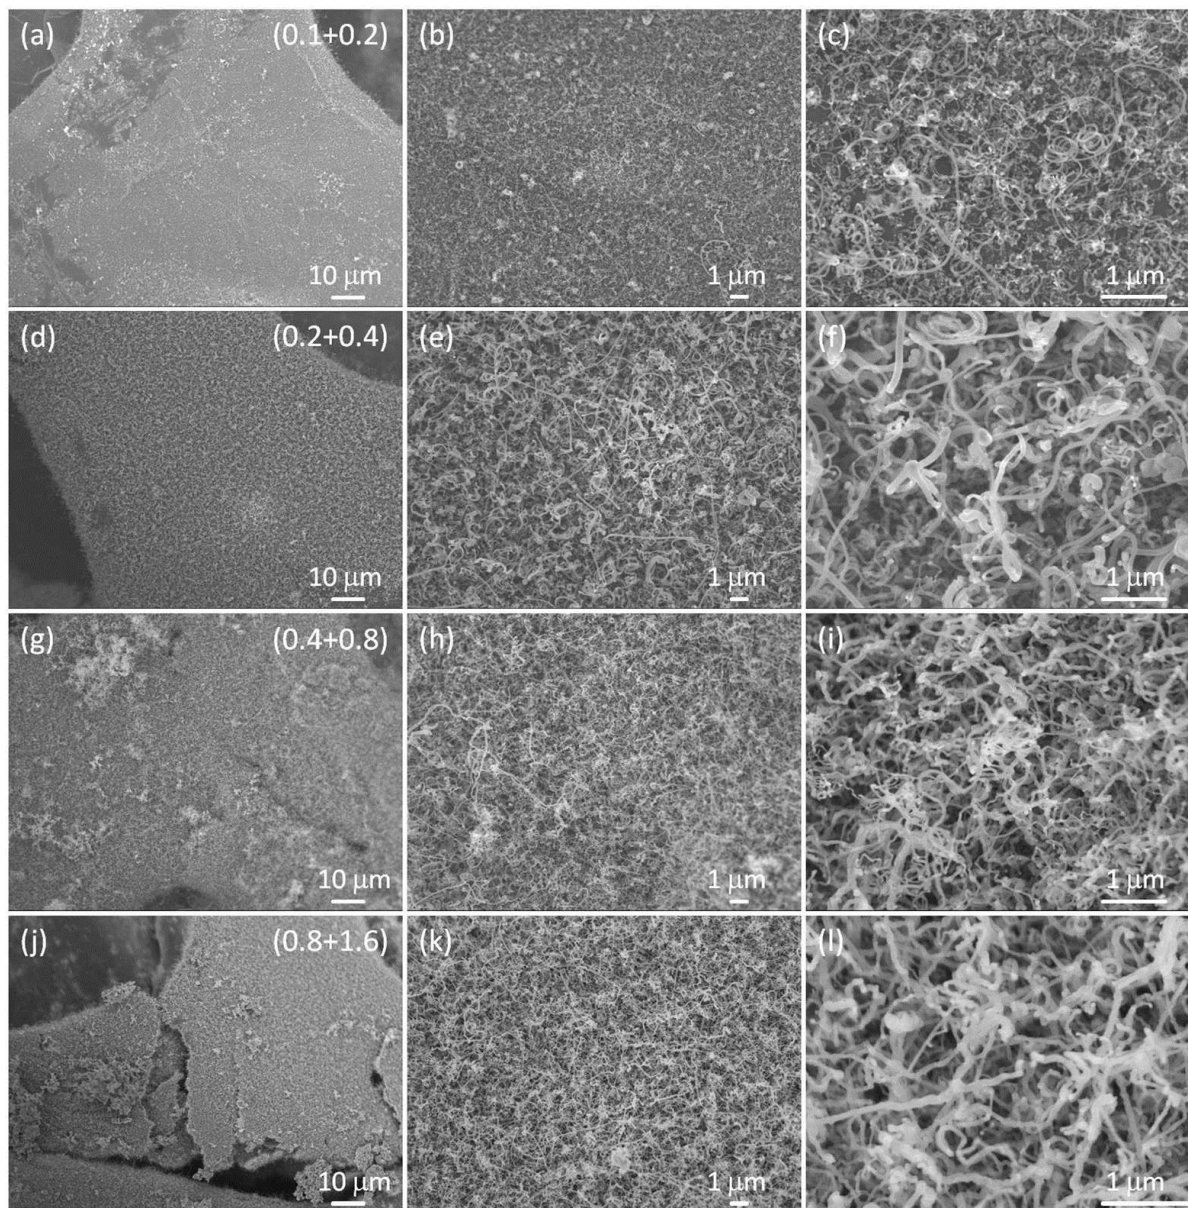

**Fig. S9** Typical FESEM images of GF/CNTs hybrid films with different loading amounts of CNTs at different magnifications. The numbers in the first column indicate the added amount of Ni, Co sources (mmol, see Method section).

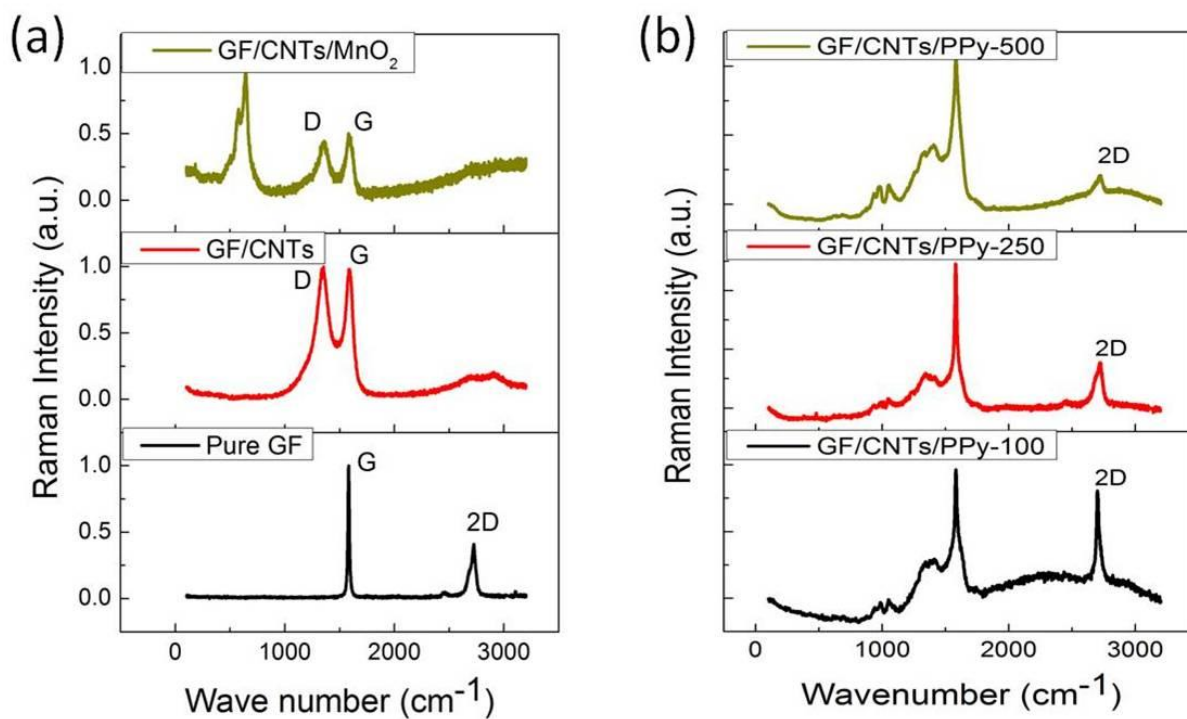

**Fig. S10** (a) Raman spectra of GF/CNTs/MnO<sub>2</sub>, GF/CNTs and pure GF. (b) Raman spectra for GF/CNTs/PPy hybrid films with different loading of Ppy. The appearance of typical MnO<sub>2</sub> Raman peaks at 491 cm<sup>-1</sup>, 568 cm<sup>-1</sup>, 640 cm<sup>-1</sup> as well as the decrease in intensity of G band further verifies the successful deposition of MnO<sub>2</sub>.<sup>3</sup> The appearance of characteristic Raman peaks at 980 cm<sup>-1</sup> and 1045 cm<sup>-1</sup> suggests the polymerization of Ppy.<sup>4</sup>

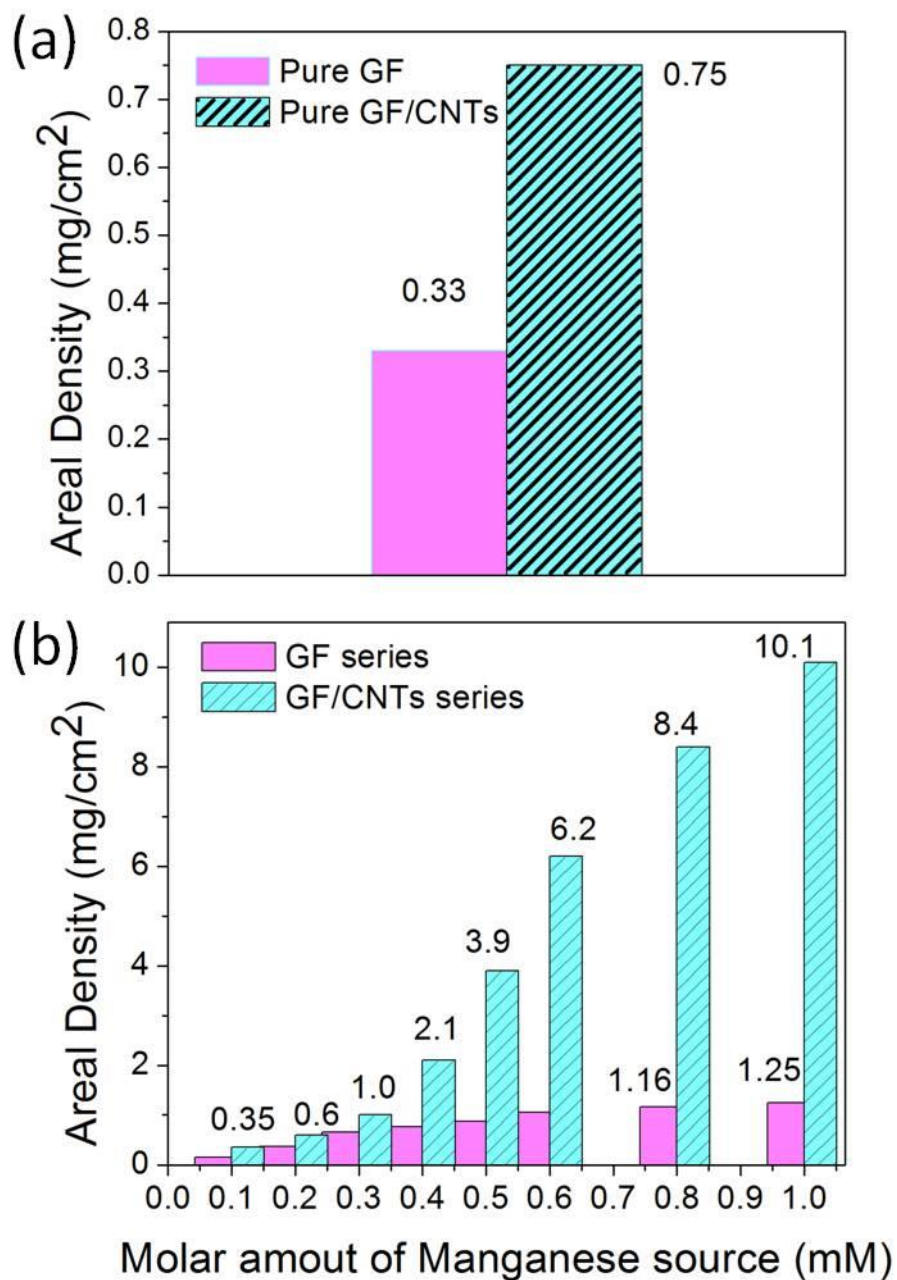

**Fig. S11** (a) Areal density of pure GF and GF/CNTs films. (b) Areal density of loaded active materials ( $\text{MnO}_2$ ) for GF and GF/CNTs with manganese source concentration from 0.1 to 1 mM.

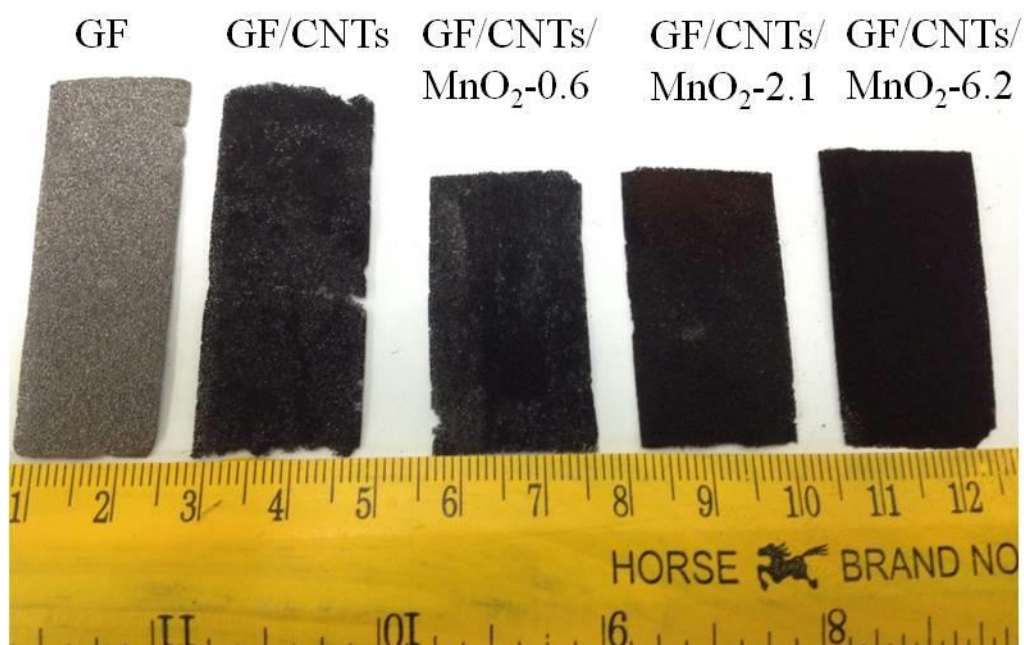

**Fig. S12** Optical image of inch-scaled pure graphene foam (GF), GF/CNTs, GF/CNTs/MnO<sub>2</sub>-0.6, GF/CNTs/MnO<sub>2</sub>-2.1 and GF/CNTs/MnO<sub>2</sub>-6.2.



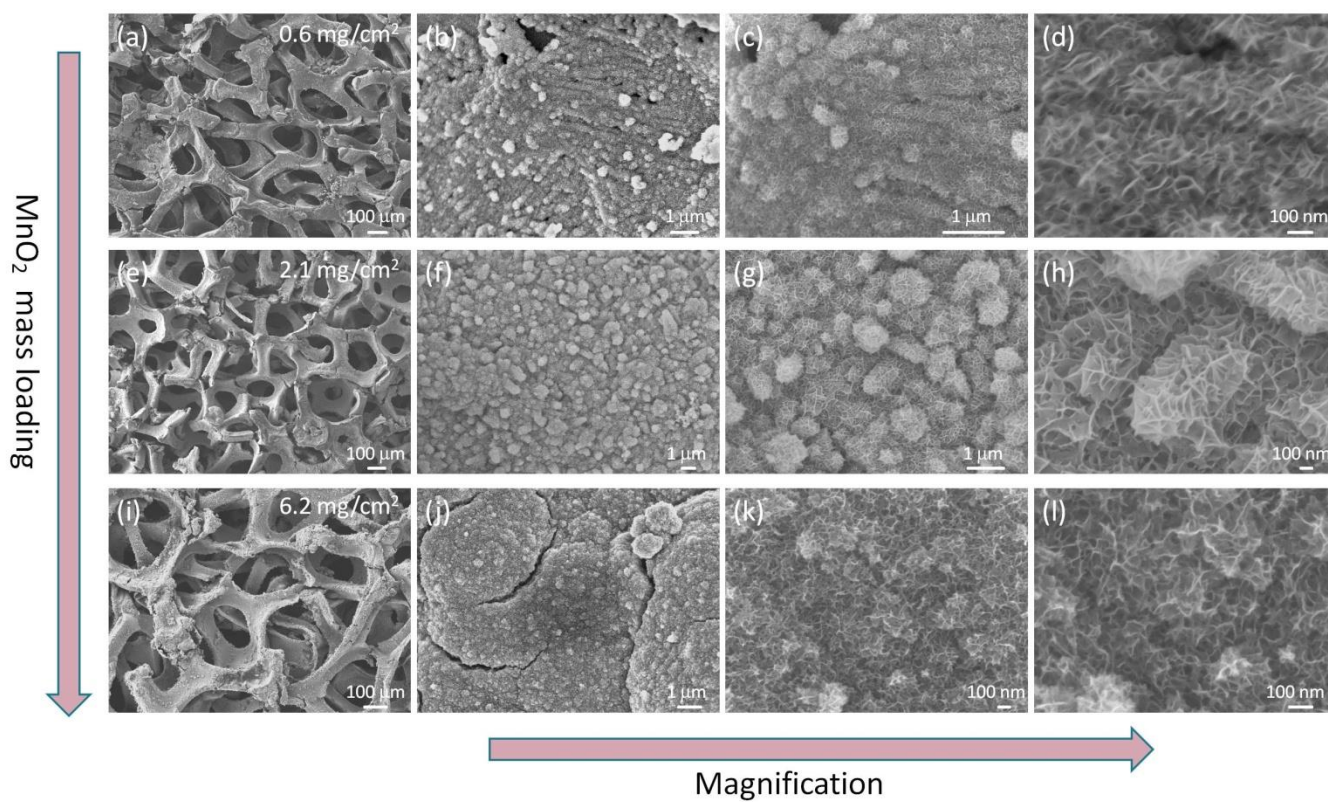

**Fig. S13** Typical FESEM images of GF/CNTs/MnO<sub>2</sub> hybrid films with different loading amount of MnO<sub>2</sub> at different magnifications.



**Table S1.** Fitting results for Electrochemical Impedance Spectroscopy

|                          | <b>Samples</b> | <b>R<sub>s</sub> (Ω)</b> | <b>R<sub>ct</sub> (Ω)</b> | <b>W</b> | <b>CPE</b> |
|--------------------------|----------------|--------------------------|---------------------------|----------|------------|
| GF/CNTs/MnO <sub>2</sub> | 0.6            | 7.4                      | 5.6                       | 0.61679  | 0.86972    |
|                          | 1.0            | 7.5                      | 12.2                      | 0.61883  | 0.86416    |
|                          | 2.1            | 8.3                      | 21.9                      | 0.87347  | 0.67988    |
|                          | 3.9            | 8.9                      | 23.5                      | 0.54721  | 0.63146    |
|                          | 6.2            | 7.1                      | 31.6                      | 0.60841  | 0.52994    |
|                          | 8.4            | 8.3                      | 56.2                      | 0.78084  | 0.63544    |
| GF/CNTs/Ppy              | 100            | 7.6                      | 6.9                       | 0.68548  | 0.62276    |
|                          | 250            | 7.5                      | 6.1                       | 0.74289  | 0.63634    |
|                          | 500            | 7.0                      | 5.2                       | 0.83395  | 0.55705    |
|                          | 1000           | 8.3                      | 10.7                      | 0.63947  | 0.57515    |
|                          | 1500           | 7.2                      | 22.6                      | 0.59736  | 0.72990    |
|                          | 2000           | 8.1                      | 28.6                      | 0.79936  | 0.70254    |
| ASCs                     | 0.6            | 1.6                      | 16.1                      | 0.76437  | 0.37655    |
|                          | 2.1            | 6.4                      | 20.0                      | 0.74294  | 0.68914    |

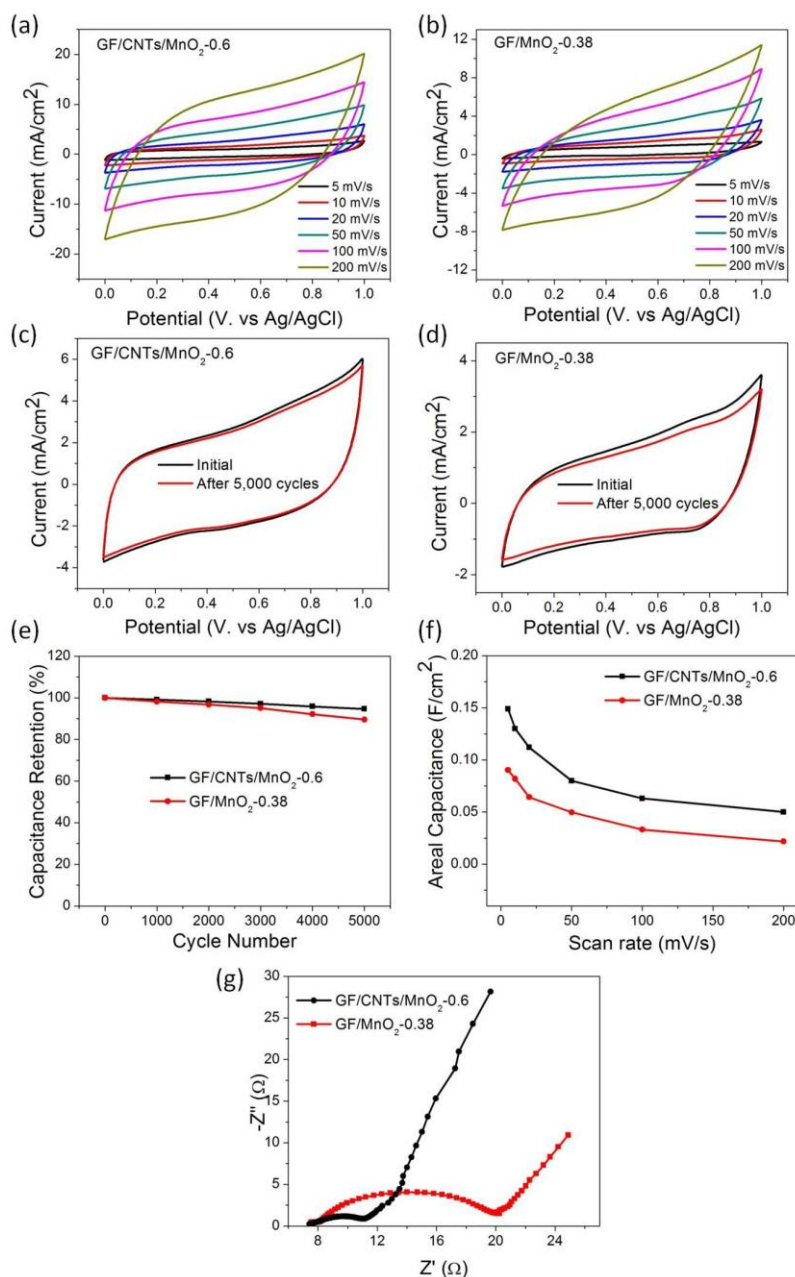

**Fig. S14** CV curves of GF/CNTs/MnO<sub>2</sub>-0.6 hybrid film (a) and GF/MnO<sub>2</sub>-0.38 (b) at various scan rates (from 5 to 200 mV/s). Comparative CV curves of GF/CNTs/MnO<sub>2</sub>-0.6 hybrid film (c) and GF/MnO<sub>2</sub>-0.38 (d) at a scan rate of 20 mV/s before and after 5,000 cycles and the corresponding capacitance retention plot up to 5,000 cycles (e). (f) Comparative areal capacitances vs. scan rate. (g) Comparative electrochemical impedance spectroscopy. The  $R_{ct}$  for GF/CNTs/MnO<sub>2</sub>-0.6 is 5.6  $\Omega$ , which is smaller than that of GF/MnO<sub>2</sub>-0.38 (13  $\Omega$ ).

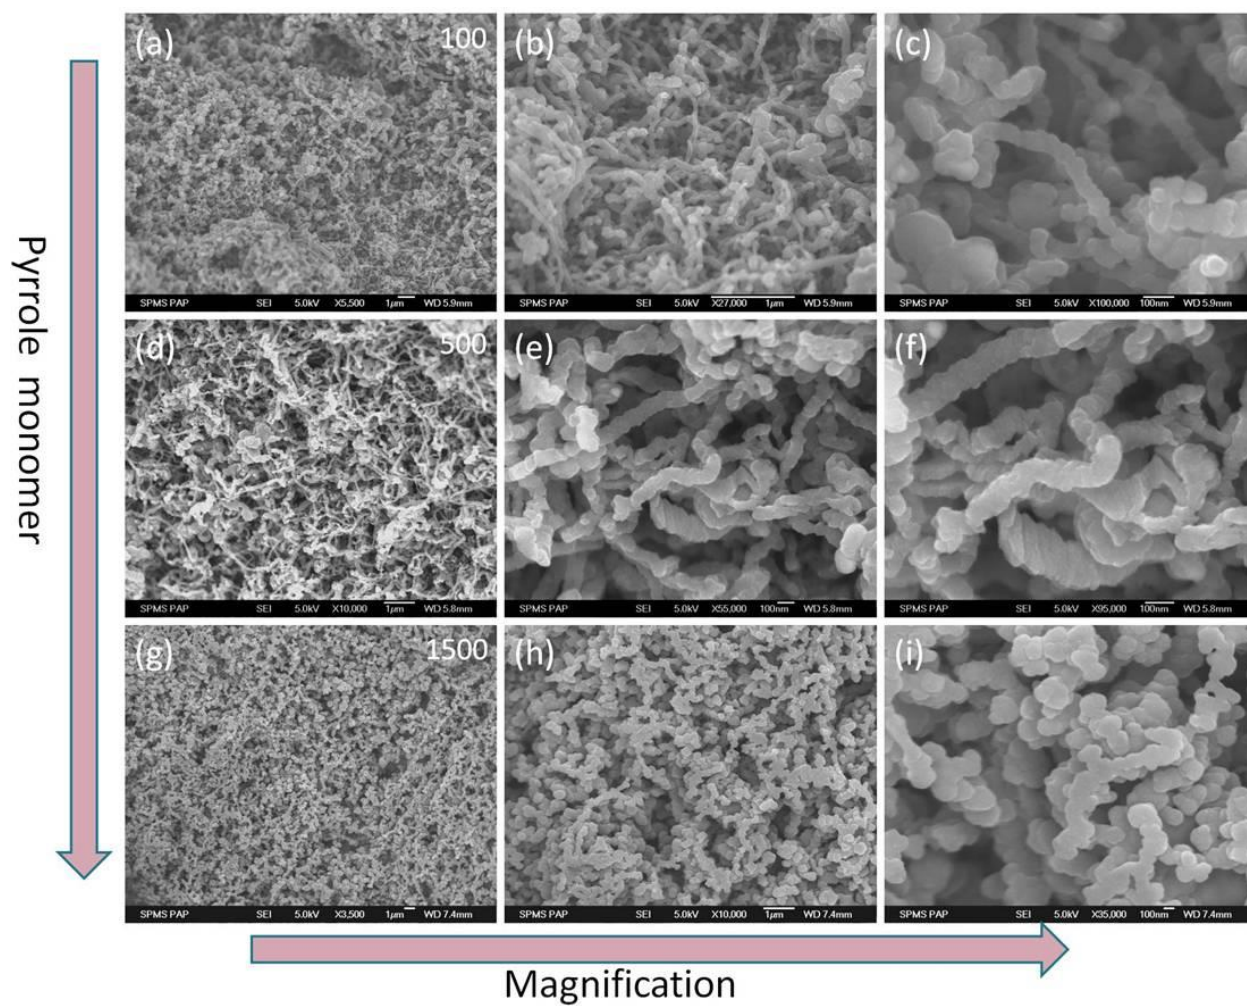

**Fig. S15** Typical FESEM images of GF/CNTs/Ppy hybrid films with different amount of monomer at different magnifications.

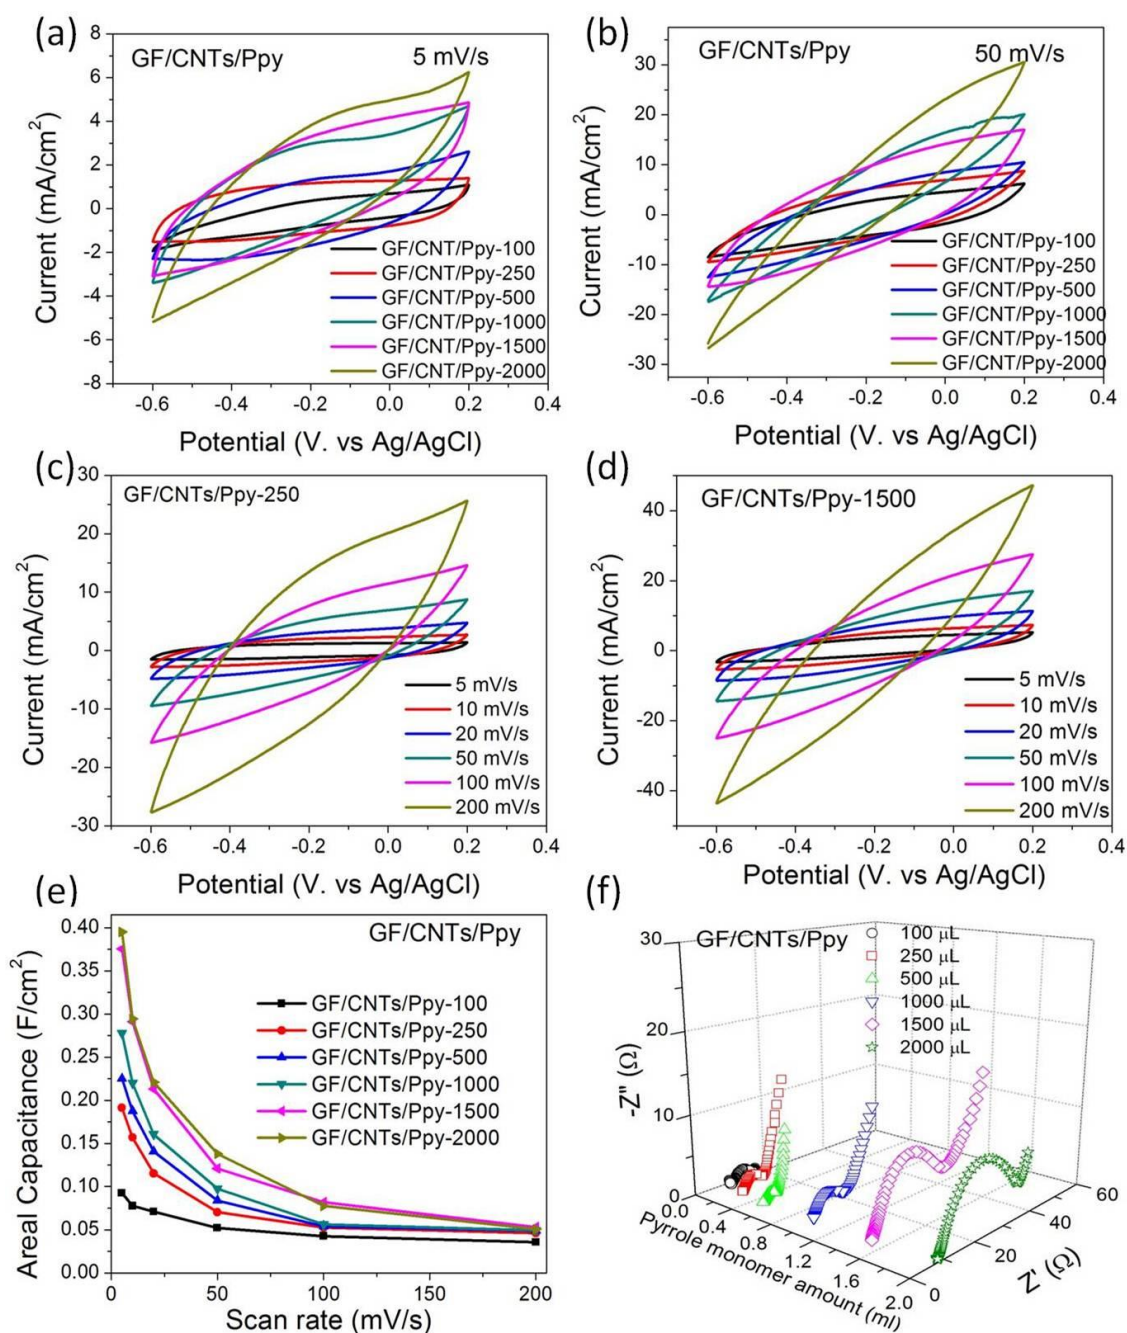

**Fig. S16** Comparative CV curves of GF/CNTs/Ppy hybrid films at scan rates of (a) 5 mV/s and (b) 50 mV/s. CV curves for (c) GF/CNTs/Ppy-250 and (d) GF/CNTs/Ppy-1500 measured at different scan rates. (e) Areal capacitance of GF/CNTs/Ppy hybrid films as a function of scan rate. (f) Nyquist plots of the GF/CNTs/Ppy hybrid films.

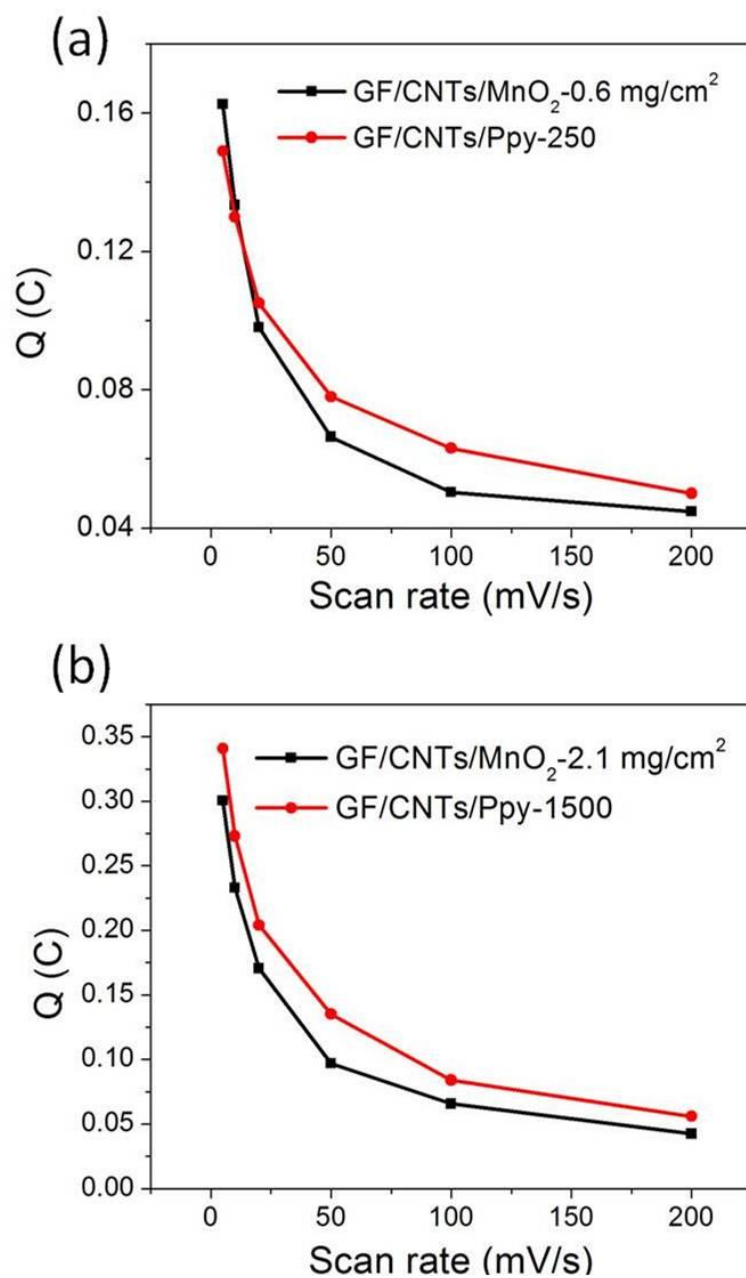

**Fig. S17** Charge balance of two couples of electrodes.



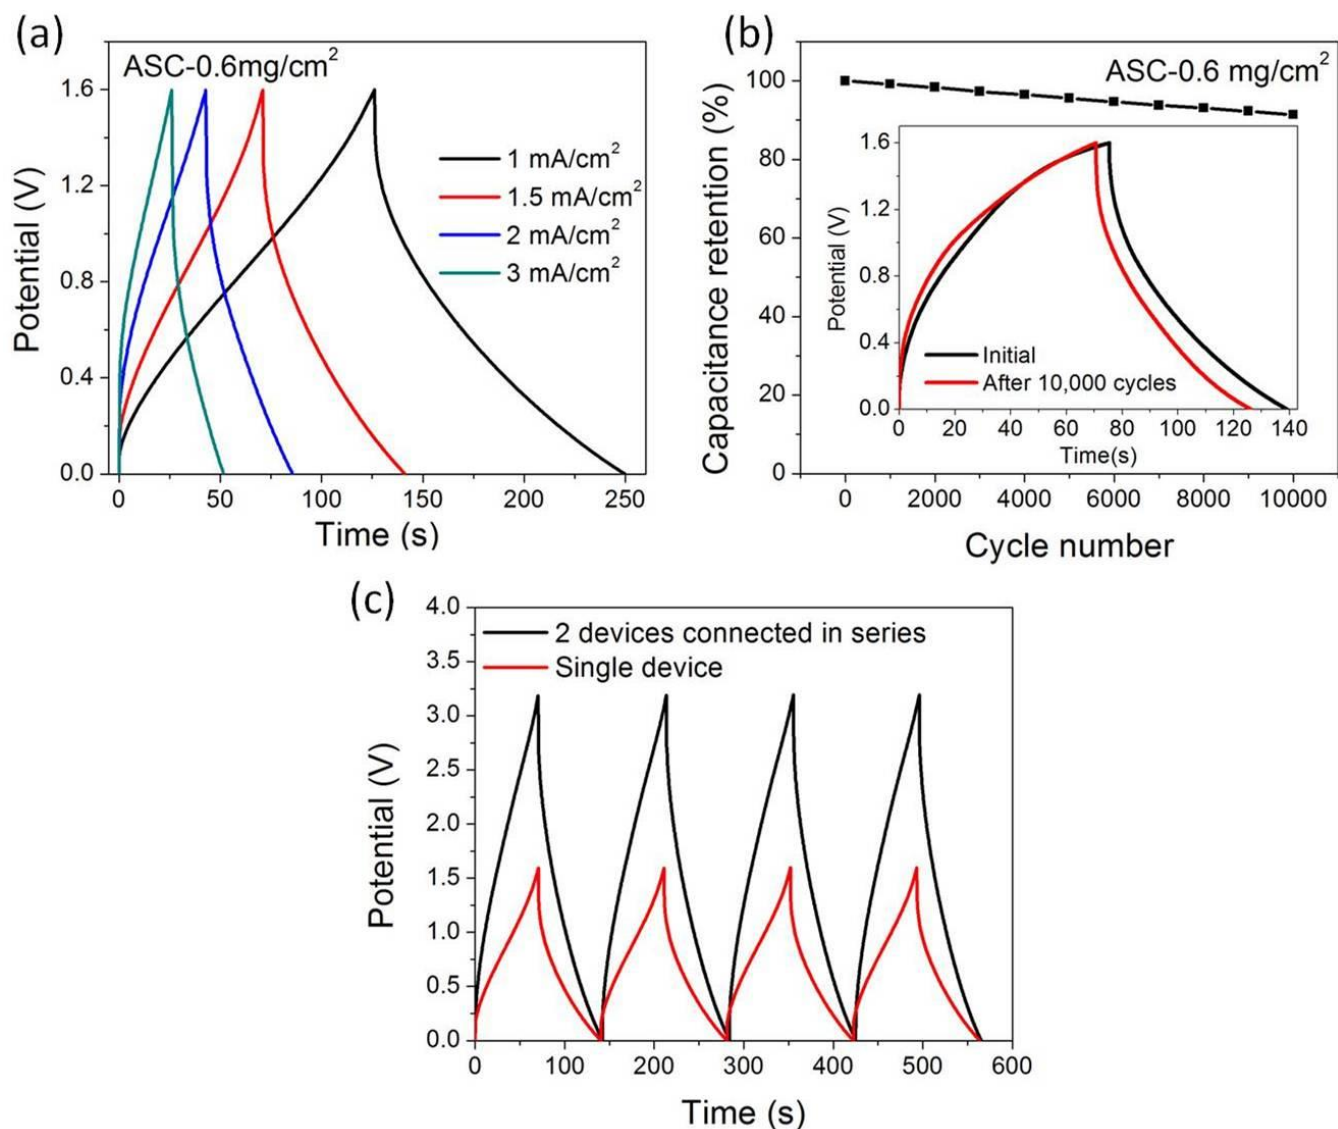

**Fig. S18** (a) Galvanostatic charge/discharge curves of ASC-0.6 at different current densities. (b) Cycling performance of ASC-0.6 at a current density of 1.5 mA/cm<sup>2</sup> for 10000 cycles. Inset shows the charge/discharge curves for the 1<sup>st</sup> and 10000<sup>th</sup> cycles. (c) Galvanostatic charge/discharge curves for two ASC-0.6 devices connected in series (with an output voltage of 3.2 V). Charge/discharge curves of a single ASC is also shown for comparison. Both of them are collected at a current density of 1.5 mA/cm<sup>2</sup>.



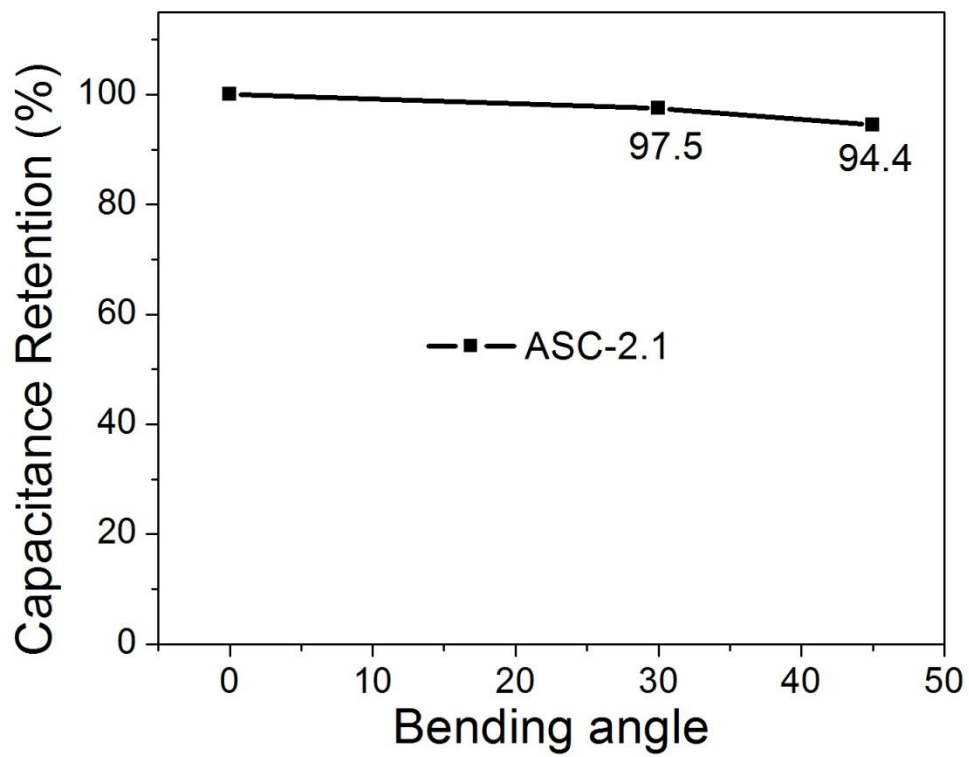

**Fig. S19** Specific capacitance vs. bending angle for ASC-2.1.

**Table S2.** Parameters for the asymmetric supercapacitors (ASCs) and the calculated volumetric and gravimetric energy/power densities based on the fully packaged cell.

|         |                                                      | Thickness<br>( $\mu\text{m}$ ) | Density<br>( $\text{g}/\text{cm}^3$ ) | Weight<br>percentage       | Volume<br>percentage    |
|---------|------------------------------------------------------|--------------------------------|---------------------------------------|----------------------------|-------------------------|
| ASC-0.6 | Positive Electrode (GF/CNTs/MnO <sub>2</sub> -0.6)   | <b>33</b>                      | <b>0.41</b>                           | <b>28.5</b>                | <b>35.9</b>             |
|         | Negative Electrode (GF/CNTs/Ppy-250)                 | <b>30</b>                      | <b>0.42</b>                           | <b>26.4</b>                | <b>32.6</b>             |
|         | Separator                                            | <b>29</b>                      | <b>0.39</b>                           | <b>23.9</b>                | <b>31.5</b>             |
|         | Electrolyte (0.5 M Na <sub>2</sub> SO <sub>4</sub> ) | -                              | <b>1.06</b>                           | <b>21.2</b>                | -                       |
| ASC-2.1 | Positive Electrode (GF/CNTs/MnO <sub>2</sub> -2.1)   | <b>36</b>                      | <b>0.79</b>                           | <b>38.9</b>                | <b>37.1</b>             |
|         | Negative Electrode (GF/CNTs/Ppy-1000)                | <b>32</b>                      | <b>0.75</b>                           | <b>32.1</b>                | <b>33</b>               |
|         | Separator                                            | <b>29</b>                      | <b>0.39</b>                           | <b>15.4</b>                | <b>29.9</b>             |
|         | Electrolyte (0.5 M Na <sub>2</sub> SO <sub>4</sub> ) | -                              | <b>1.06</b>                           | <b>13.6</b>                | -                       |
|         |                                                      |                                |                                       |                            |                         |
|         |                                                      | E <sub>max</sub><br>(Wh/kg)    | P <sub>max</sub><br>(kW/kg)           | E <sub>max</sub><br>(Wh/L) | P <sub>max</sub> (kW/L) |
| ASC-0.6 | Active materials (MnO <sub>2</sub> +Ppy)             | <b>22.2</b>                    | <b>10.3</b>                           | -                          | -                       |
|         | Electrodes (including GF/CNTs films)                 | <b>9.4</b>                     | <b>4.4</b>                            | <b>3.9</b>                 | <b>1.8</b>              |
|         | Full Cell                                            | <b>5.2</b>                     | <b>2.4</b>                            | <b>2.7</b>                 | <b>1.2</b>              |
|         |                                                      |                                |                                       |                            |                         |
| ASC-2.1 | Active materials (MnO <sub>2</sub> +Ppy)             | <b>22.8</b>                    | <b>2.7</b>                            | -                          | -                       |
|         | Electrodes (including GF/CNTs films)                 | <b>16.2</b>                    | <b>1.9</b>                            | <b>12.5</b>                | <b>1.5</b>              |
|         | Full Cell                                            | <b>11.5</b>                    | <b>1.3</b>                            | <b>8.7</b>                 | <b>1.0</b>              |

Remarks: The electrolyte is absorbed by the electrodes and thus does not take up any volume in the packaged cell.

For ASC-0.6: total cell mass is 18.8 mg; total volume is 36.8  $\mu\text{L}$ ; density of packaged cell is 0.51  $\text{g}/\text{cm}^3$ .

For ASC-2.1: total cell mass is 29.3 mg; total volume is 38.4  $\mu\text{L}$ ; density of packaged cell is 0.76  $\text{g}/\text{cm}^3$ .

## Reference

1. Audemer, A., Delahaye, A., Farhi, R., Sac-Epée, N. & Tarascon, J. M. Electrochemical and Raman Studies of Beta-Type Nickel Hydroxides Ni<sub>1-x</sub>Co<sub>x</sub>(OH)<sub>2</sub> Electrode Materials. *J. Electrochem. Soc.* **144**, 2614-2620 (1997).
2. Dimiev, A. *et al.* Layer-by-Layer Removal of Graphene for Device Patterning. *Science* **331**, 1168-1172 (2011).
3. Gao, T., Fjellvåg, H. & Norby, P. A comparison study on Raman scattering properties of  $\alpha$ - and  $\beta$ -MnO<sub>2</sub>. *Anal. Chim. Acta* **648**, 235-239 (2009).
4. Le, H. N. T., Bernard, M. C., Garcia-Renaud, B. & Deslouis, C. Raman spectroscopy analysis of polypyrrole films as protective coatings on iron. *Synth. Met.* **140**, 287-293 (2004).
